# Supplementary material for: Kairomonal Effect of Aphid Alarm Pheromones and Analogs on the Parasitoid Diaeretiella rapae
Source: MDPI journal article supplement (doi:10.3390/insects13111055), 2022-11-15
Supplement: s1 [file s1]

# Kairomonal Effect of Aphid Alarm Pheromones and Analogs on the Parasitoid *Diaeretiella rapae*

Yaoguo Qin \*, Shangyang Zhang and Zhengxi Li \*

Department of Entomology and MOA Key Laboratory for Monitoring and Environment-Friendly Control of Crop Pests, College of Plant Protection, China Agricultural University, Beijing 100193, China

\* Correspondence: qinyg1018@163.com (Y.Q.); zxli@cau.edu.cn (Z.L.)

## Supplementary

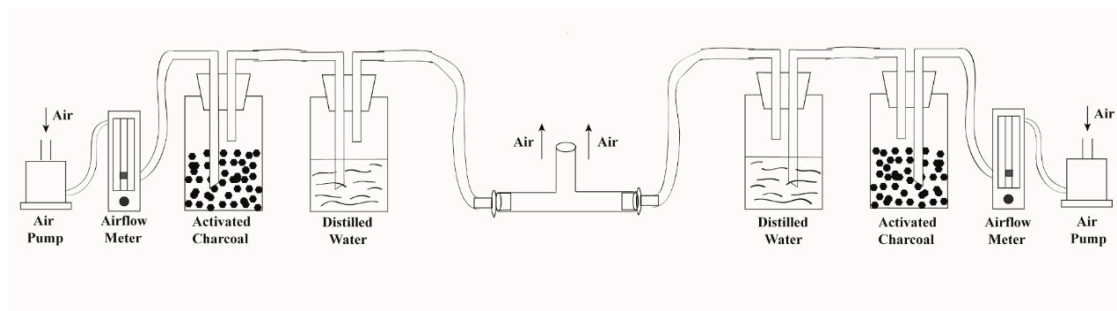

**Figure S1.** Olfactometer device for bioassay of behavioral response of *Diaeretiella rapae* to components and analogs of aphid alarm pheromone.

**Table S1.** The sets for olfactometer bioassays and behavioral response time bioassay

| treatments        |                       | concentrations                | numbers of tested parasitoids | values for statistical analysis |
|-------------------|-----------------------|-------------------------------|-------------------------------|---------------------------------|
| Single components | (-)- $\alpha$ -pinene |                               |                               | (Choice percentage)             |
|                   | (-)- $\beta$ -pinene  |                               |                               | comparing the number of         |
|                   | (+)-limonene          |                               |                               | individuals in the control      |
|                   | E $\beta$ F           | 0.1 $\mu\text{g}/\mu\text{L}$ |                               | and treatment arms: $\chi^2$    |
|                   | Analog I              | 1.0 $\mu\text{g}/\mu\text{L}$ | 60 females                    | goodness-of-fit test            |
| Blends            | Analog II             |                               |                               |                                 |
|                   | Blend I               | 5.0 $\mu\text{g}/\mu\text{L}$ |                               | PI values and response          |
|                   | Blend II              |                               |                               | times: ANOVA followed           |
|                   | Blend III             |                               |                               | by Tukey's B test at            |
|                   | Blend IV              |                               |                               | P<0.05                          |

### File S1. Structural characterization data for E $\beta$ F Analog I

$^1\text{H}$  NMR (500 MHz,  $\text{CDCl}_3$ ):  $\delta$  ppm 11.10 (s, 1H, ArOH), 7.70 (dd, 1H,  $J_1 = 8.00$  Hz,  $J_2 = 1.15$  Hz, ArH), 7.30 (d, 1H,  $J = 7.25$  Hz, ArH), 6.77 (t, 1H,  $J = 3.85$  Hz, ArH), 5.44-5.47 (m, 1H, C=CH), 5.07-5.10 (m, 1H, C=CH), 4.85 (d, 2H,  $J = 7.10$  Hz,  $\text{CH}_2\text{-O}$ ), 2.26 (s, 3H, Ar- $\text{CH}_3$ ), 2.07-2.15 (m, 4H, C- $\text{CH}_2\text{CH}_2\text{-C}$ ), 1.77 (s, 3H, C- $\text{CH}_3$ ), 1.68 (s, 3H, C- $\text{CH}_3$ ), 1.60 (s, 3H, C- $\text{CH}_3$ );  $^{13}\text{C}$  NMR (125 MHz,  $\text{CDCl}_3$ ): 170.64, 160.06, 143.18, 136.31, 131.96, 127.51, 126.54, 123.66, 118.38, 117.81, 111.97, 62.13, 39.55, 26.27,

170.64  
160.96  
143.18  
136.31  
135.87  
127.51  
126.54  
123.66  
118.29  
117.81  
111.97  
77.29  
77.07  
76.79  
62.13  
29.55  
26.57  
25.68  
17.72  
16.60  
13.30  
0.01

f1 (ppm)

3

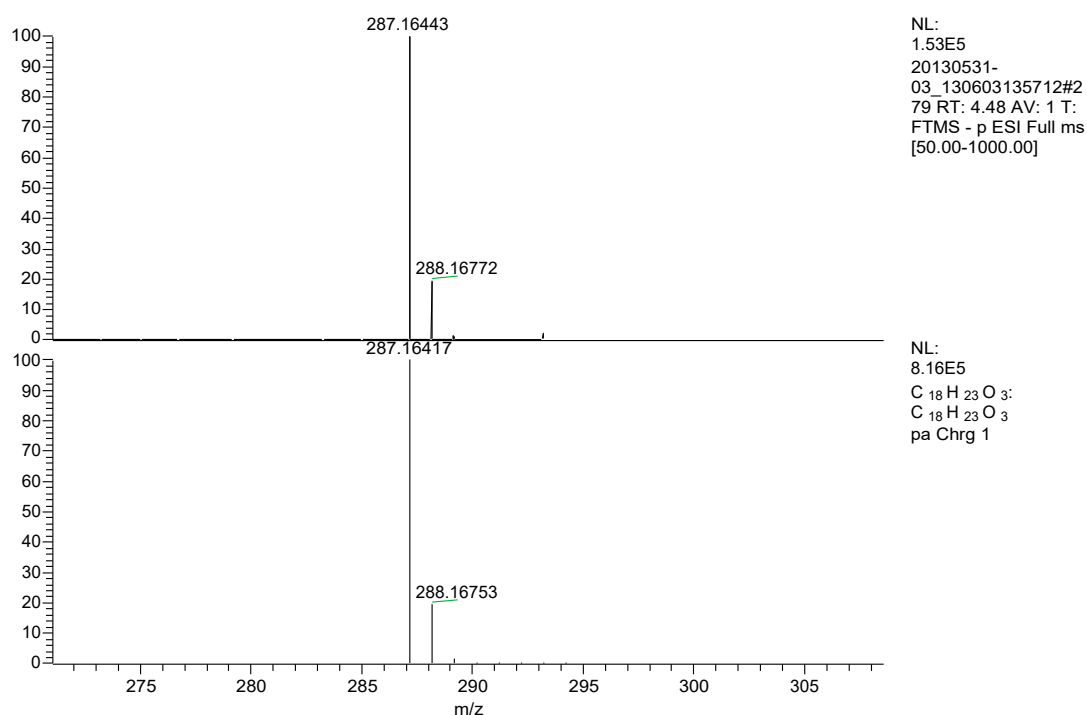

**Figure S4. HRMS spectra of EβF Analog I**

## File S2. Structural characterization data for EβF Analog II

<sup>1</sup>H NMR (500 MHz, CDCl<sub>3</sub>): δ ppm 11.11 (s, 1H, ArOH), 7.45-7.46 (dd, 1H,  $J_1 = 8.15$  Hz,  $J_2 = 1.45$  Hz, ArH), 7.03 (d, 1H,  $J = 7.25$  Hz, ArH), 6.82 (t, 1H,  $J = 8.05$  Hz, ArH), 5.44-5.47 (m, 1H, C=CH), 5.07-5.10 (m, 1H, C=CH), 4.87 (d, 2H,  $J = 7.10$  Hz, CH<sub>2</sub>-O), 3.90 (s, 3H, O-CH<sub>3</sub>), 2.07-2.15 (m, 4H, C-CH<sub>2</sub>CH<sub>2</sub>-C), 1.77 (s, 3H, C-CH<sub>3</sub>), 1.68 (s, 3H, C-CH<sub>3</sub>), 1.60 (s, 3H, C-CH<sub>3</sub>). <sup>13</sup>C NMR (125 MHz, CDCl<sub>3</sub>): 170.46, 152.08, 148.52, 143.37, 131.97, 123.62, 121.18, 118.39, 117.66, 116.40, 112.94, 62.32, 56.18, 39.55, 26.25, 25.68, 17.72, 16.61. HRMS (ESI<sup>+</sup>)  $m/z$  calcd for C<sub>18</sub>H<sub>23</sub>O<sub>4</sub> [M-H]<sup>+</sup> 303.15909; found: 303.15921.

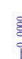

**Figure S5.  $^1\text{H}$  NMR spectra of E $\beta$ F Analog II**

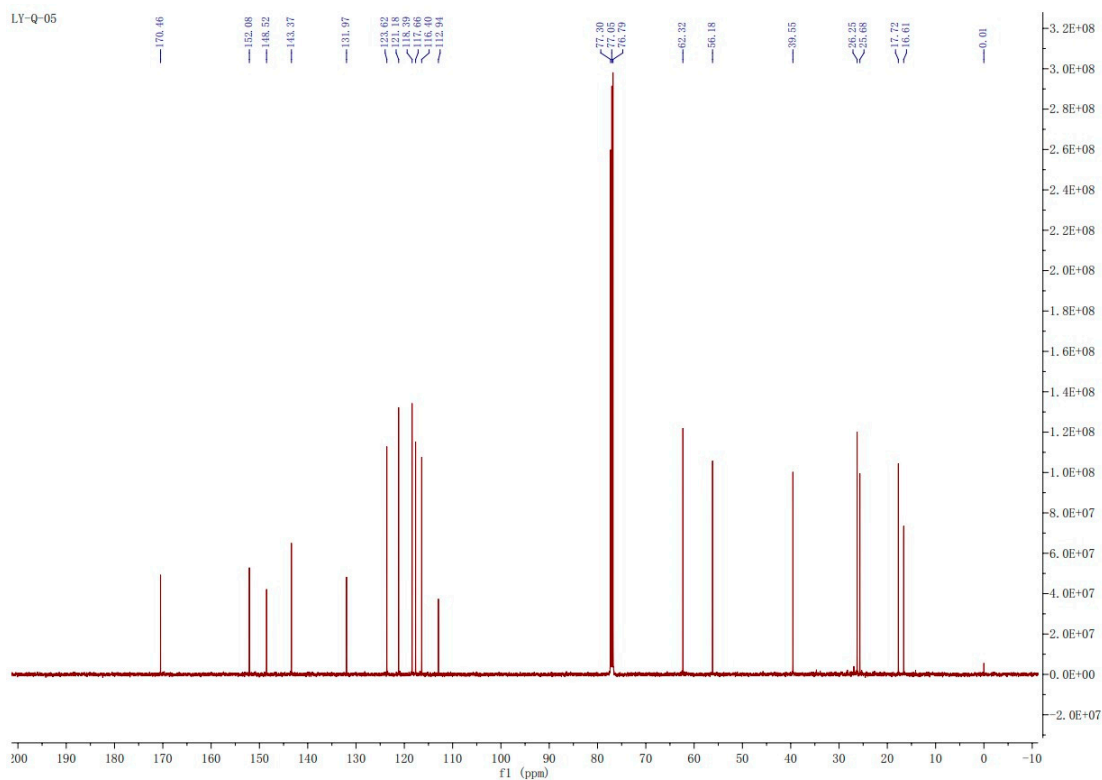

**Figure S6.  $^{13}\text{C}$  NMR spectra of E $\beta$ F Analog II**

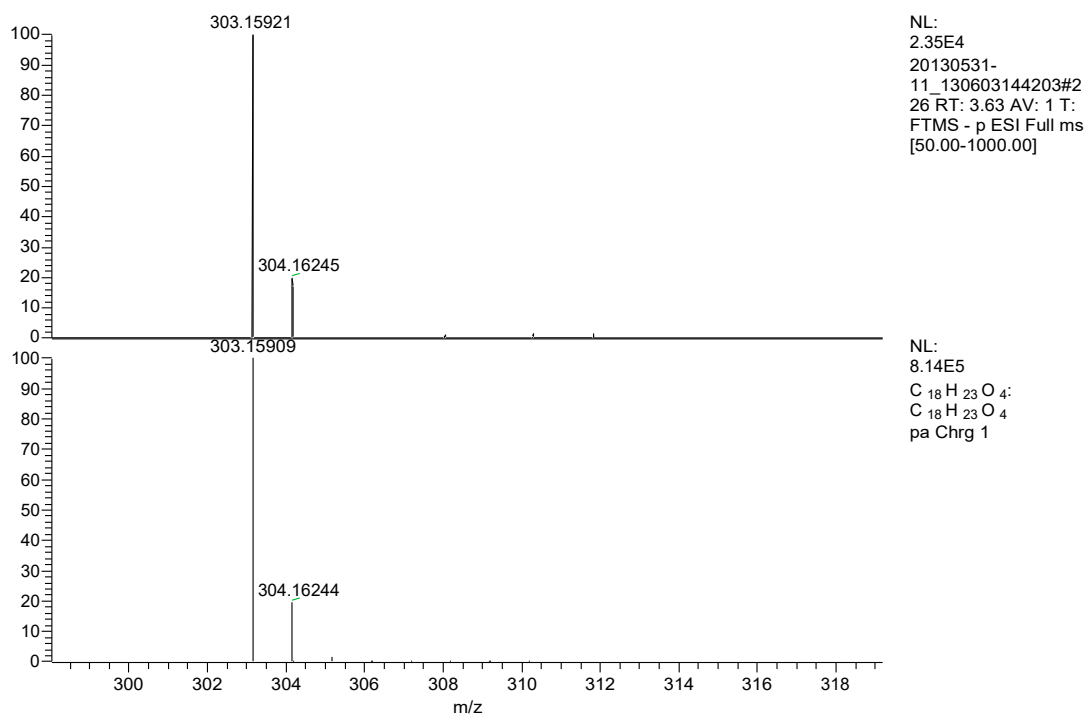

**Figure S7. HRMS spectra of E $\beta$ F Analog II**
